# Supplementary material
Source: PubMed Central journal article supplement (PMC2663744)
Supplement: pp.108.132092_1.pdf [file pp.108.132092_1.pdf]

**Table S1: Primers for *RabE* cloning and mutagenesis**

| <b>Primer</b> | <b>Sequence</b>                                    |
|---------------|----------------------------------------------------|
| rabE-5'       | 5'- <u>GAATTC</u> <b>ATG</b> GCGGTTGCGCCGGCAAG-3'  |
| rabE-3'       | 5'- <u>GGATCC</u> GAGCAATCATACT <b>CCTAAAC</b> -3' |
| Q74L-for      | 5'-CACTGCTGGTCT <u>T</u> AGAACGTTTC-3'             |
| Q74L-rev      | 5'-GAAACGTTCT <u>A</u> GACCAGCAGTG-3'              |
| S29N-for      | 5'-GTGGGGAAGA <u>A</u> TTGTTTGTTAC-3'              |
| S29N-rev      | 5'-GTAACAAACA <u>A</u> TTCTTCCCCAC-3'              |

Restriction sites are underlined (*EcoRI* for rabE-5', *BamHI* for rabE-3'). Start and stop codons are in bold; single nucleotide changes are in bold and underlined.

**Table S2. Gene-specific primers for RT-PCR**

| <b>Gene</b>     | <b>Locus</b> | <b>Forward and Reverse Primers</b>                                     |
|-----------------|--------------|------------------------------------------------------------------------|
| <i>ACT8</i>     | At1g49240    | F: 5'-GCTTCATCGGCCGTTGCATTTTC-3'<br>R: 5'-GATCCCGTCATGGAAACGATGTCTC-3' |
| <i>AtRabD1</i>  | At3g11730    | F: 5'-CTCGGAAACGCAGTCTTCAGC-3'<br>R: 5'-GCTTATTCAAGACACAGCGACATGG-3'   |
| <i>AtRabD2a</i> | At1g02130    | F: 5'-GATCTCTGGCTCTGTATCGCTCG-3'<br>R: 5'-GGATATTGCTAGGCTGGTCACGTC-3'  |
| <i>AtRabD2b</i> | At5g47200    | F: 5'-CTGAATTGACTGCCGGAGATTCC-3'<br>R: 5'-GATGATCGAAAGAGGAGTGGTGAC-3'  |
| <i>AtRabD2c</i> | At4g17530    | F: 5'-CATCACCGACGAAGATCACGG-3'<br>R: 5'-GCGAATTAAGAGGAGCAGCAGC-3'      |
| <i>AtRabE1a</i> | At3g53610    | F: 5'-CCGACGATCTATCTTCCCCGAGTAG-3'<br>R: 5'-GACAGGCGTCGTGGACCC-3'      |
| <i>AtRabE1b</i> | At5g59840    | F: 5'-CCAACAAGGTCTCTTCTCTTCTC-3'<br>R: 5'-CAACTTTGGAGCCTTTTGGGAC-3'    |
| <i>AtRabE1c</i> | At3g46060    | F: 5'-GTCGTCCGCCATAACCTTC-3'<br>R: 5'-CACTTCACCCCCAACTTTTTTTCG-3'      |
| <i>AtRabE1d</i> | At5g03520    | F: 5'-GTTTCTGACGATGGCGGTTGC-3'<br>R: 5'-CAGCAAGCTGACTTCTCGGCTG-3'      |
| <i>AtRabE1e</i> | At3g09900    | F: 5'-GGCTGTCTCCGGCGAGAAG-3'<br>R: 5'-CATAGGACGATCCCTTGAATGATGC-3'     |

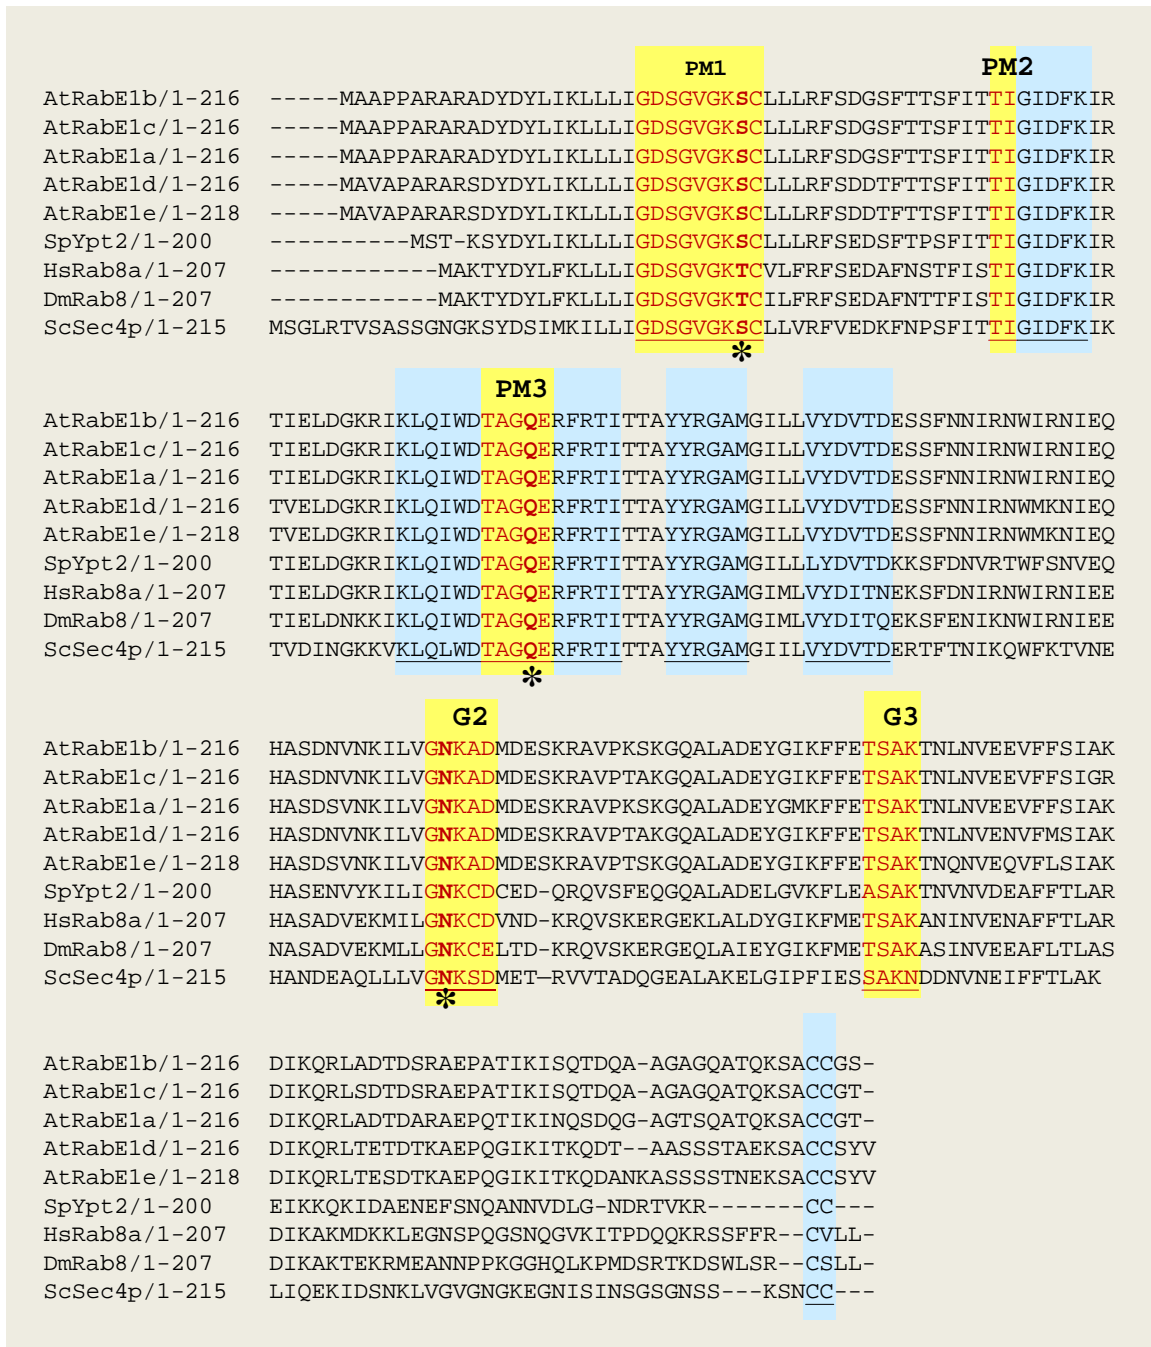

**Figure S1:** ClustalW alignment of the five Arabidopsis RabE proteins and their closest homologues in other organisms.

Yellow boxes highlight the highly conserved nucleotide-binding domain residues (PM = phosphate/magnesium-binding domain; G = guanine base-binding domain). Blue boxes highlight Rab-specific residues (Stenmark and Olkkonen, 2001). Mutation of the conserved amino acids marked with asterisks is used to create Rab variants that have a higher affinity for GDP than for GTP (S/T in PM1), or that cannot hydrolyze GTP (Q in PM3). Mutating the N in G2 results in Rabs that cannot bind any nucleotide. The two C residues highlighted at the carboxy-terminus represent sites of geranylgeranylation that are critical for membrane targeting.

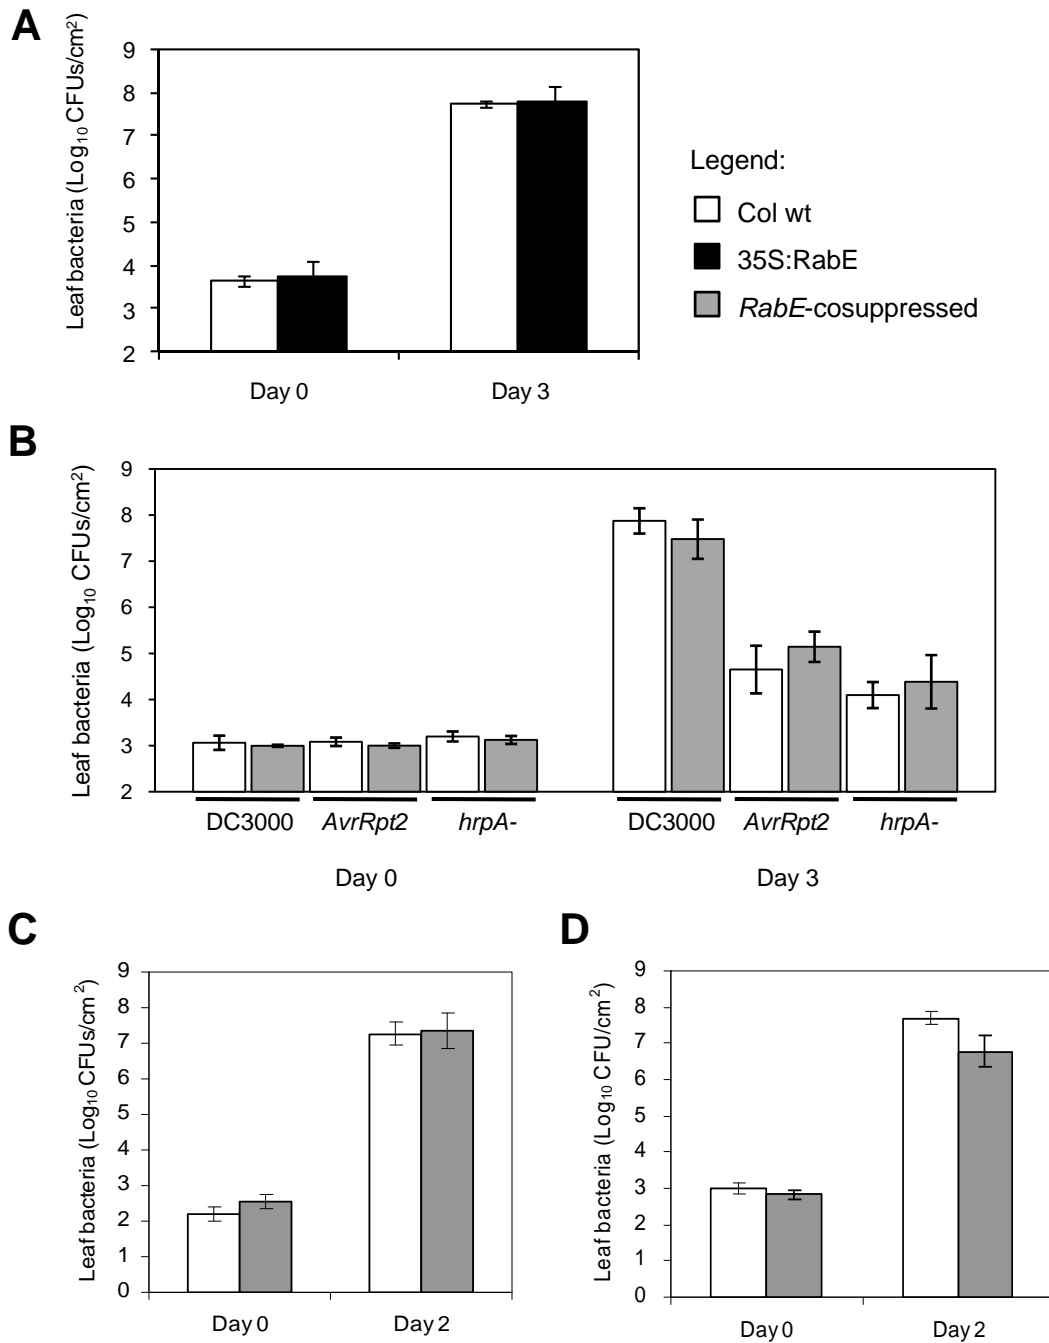

**Figure S2: Bacterial multiplication assays.**

A, *Pst* DC3000 multiplication in GFP-RabE1d-expressing plants (grey bars) is similar to that in wild-type Arabidopsis (white bars). *Pst* DC3000 was vacuum-infiltrated at a density of  $1 \times 10^6$  CFUs/ml.

B, Bacterial multiplication in *RabE*-cosuppressed plants (grey bars) is similar to that in wild-type Arabidopsis (white bars). Bacteria were vacuum-infiltrated at a density of  $5 \times 10^5$  CFUs/ml.

C, Young and/or non-stressed RabE-cosuppressed plants (in grey) are as susceptible to *Pst* DC3000 as wild-type (in white), whereas older RabE-cosuppressed plants show a low degree of basal resistance (D). *Pst* DC3000 was syringe-infiltrated at a density of  $1 \times 10^5$  CFUs/ml. Error bars represent standard deviation.

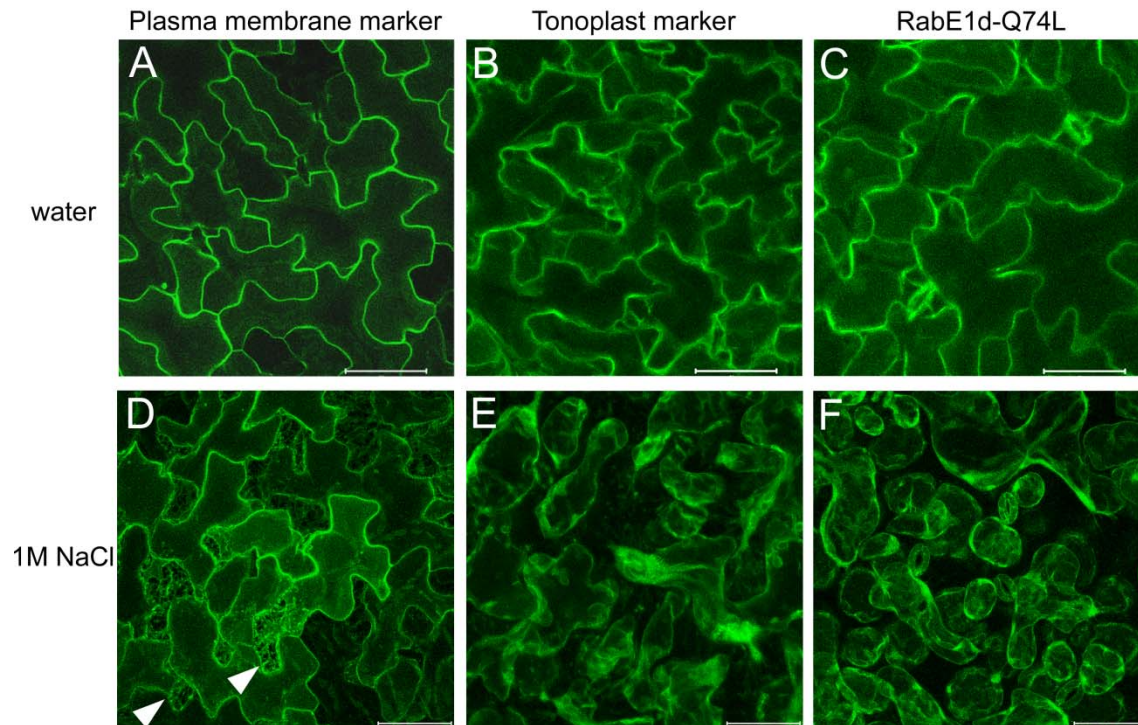

**Figure S3:** Localization pattern of GFP-RabE1d-Q74L compared to the localization of a PM marker protein and a tonoplast marker protein. A and D, Arabidopsis line Q8, expressing a GFP fusion to the plasma membrane integral protein PIP2A. B and E, Arabidopsis line Q5, expressing a GFP fusion to delta-TIP (Tonoplast Integral Protein), a vacuolar membrane channel protein. C and F, Arabidopsis expressing GFP-RabE1d-Q74L. D-F, samples were plasmolyzed in 1M NaCl. Arrowheads in panel D indicate Hechtian strands visible after plasmolysis in the PM marker-expressing Q8 plants. No Hechtian strands are observed in the tonoplast marker-expressing Q5 line (E) or in RabE-Q74L plants (F).

All images are Z-stacks. Scale bars = 50  $\mu$ m.

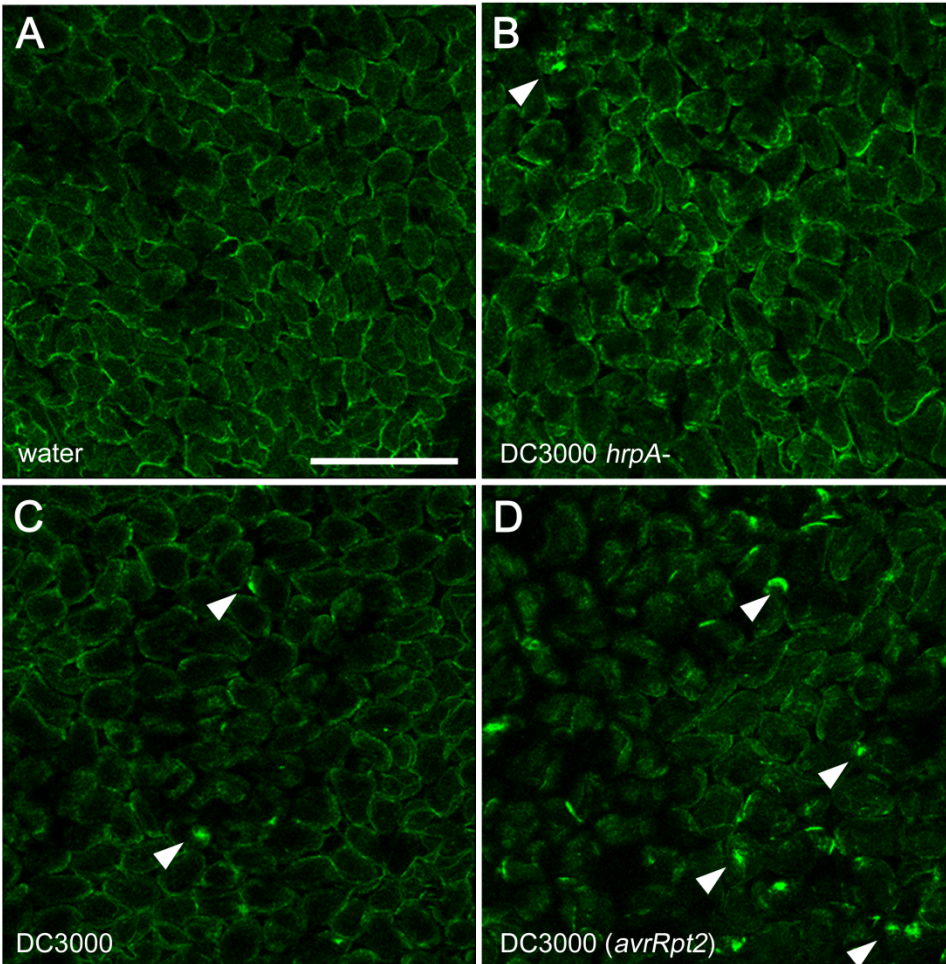

**Figure S4.** Focal accumulation of GFP-RabE1d in response to bacteria. Leaves of transgenic GFP-RabE1d *Arabidopsis* were syringe-inoculated with various strains of *Pst* DC3000 at a density of  $1 \times 10^8$  CFUs/ml. Confocal microscope observation 6 h post inoculation revealed focal accumulation of the fluorescent GFP-RabE1d in mesophyll cells. A, no bacteria; B, *Pst* DC3000 *hrpA*<sup>-</sup> mutant bacteria, non pathogenic; C, wild-type *Pst* DC3000, virulent; D, *Pst* DC3000 (*avrRpt2*), avirulent. Arrowheads indicate some of the points of accumulation. All images are Z-stacks. Scale bar = 200  $\mu$ m.
